# Supplementary material for: Identification and Analysis of Phosphatidylethanolamine-Binding Protein Family Genes in the Hangzhou White Chrysanthemum (Chrysanthemum morifolium Ramat)
Source: MDPI journal article supplement (doi:10.3390/agriculture13020374), 2023-02-04
Supplement: s1 [file s1]

---

## Supplemental material

**Table S1. RT-PCR of primers of *CmPEBP* genes.**

| <b>Genes</b>  | <b>Forward primer sequence (5'—3')</b> | <b>Reverse primer sequence (5'—3')</b> |
|---------------|----------------------------------------|----------------------------------------|
| <i>CmFT1</i>  | ATGTCTTGCAATAGGGAGGGT                  | TATCTTCTTCTGGCGGCATT                   |
| <i>CmFT2</i>  | ATGCCGAGGGAAAGGGA                      | TCCGTCTTCCACCAAATCTA                   |
| <i>CmFT3</i>  | ATGCCGAGGGAAAGGGA                      | TCCGTCTTCTACCAAATCCA                   |
| <i>CmTFL1</i> | ATGTCGCTTGCAATAGGG                     | TCTTCTTCGTGCGGCATT                     |
| <i>CmTFL2</i> | ATGTCTTGCAATAGGGAGGGT                  | TTATCTTCTTCTGGCGGCATT                  |
| <i>CmTFL3</i> | ATGGCAAGATTAACTTCGGG                   | TCGTCTTCTGGGAGCTGTTT                   |
| <i>CmTFL4</i> | ATGTCAAGAATGAATGAGCCA                  | ATCTTCTACGGGCTGCATTT                   |
| <i>CmMFT1</i> | ATGGCAAGATTAACTTCGGG                   | TCGTCTTCTGGGAGCTGT                     |
| <i>CmMFT2</i> | ATGGGTTCAACGGCATTTTA                   | AACCGAGATTCTTCCTCTTCCTAG               |

**Table S2. qRT-PCR of primers of *CmPEBP* genes.**

| <b>Genes</b>  | <b>Forward primer sequence (5'—3')</b> | <b>Reverse primer sequence (5'—3')</b> |
|---------------|----------------------------------------|----------------------------------------|
| <i>CmFT1</i>  | CCAGCGACAACAGGAGCACAG                  | ACTGGAGATCCGAGGTTGTAGAGC               |
| <i>CmFT2</i>  | CCCAAGGCCAACAATAG                      | ATAAACTGCGGCTACTGG                     |
| <i>CmFT3</i>  | GTGATATGAGAGCCCAAGGC                   | TCCGAGGTTGTAGAGCTCCG                   |
| <i>CmTFL1</i> | CTGATGCTACTTTTGGACGG                   | CGGTAACCCCAAGTCATTTT                   |
| <i>CmTFL2</i> | GGACGGGAGATTGTGAGCTA                   | TGGCCTCACTGATTGCCTTG                   |
| <i>CmTFL3</i> | GACATCCCAGGCACCACT                     | GTCATTCTCACGAGCAAAGC                   |
| <i>CmTFL4</i> | GAGGTGGTGGACACATTCGC                   | TGGAACGTCTGGATCGGTCA                   |
| <i>CmMFT1</i> | TGGTGAATGGTCAAGGTGC                    | ACCCTCTGGTAGACCTTTT                    |
| <i>CmMFT2</i> | CAACATTCCTGGTGGCTCCTTGAC               | TGGACTCAGATTGTGCTTGCTTG                |
| <i>CmEF</i>   | ATTGAGCGATCCACCAACTTGAC                | CCATACCAGGCTTGATGACACCAG               |

**Table S3. Comparison of the 9 CmPEBP ORFs and putative amino acid sequences.**

|               | Putative protein sequences identity (%) |              |              |               |               |               |               |               |               |
|---------------|-----------------------------------------|--------------|--------------|---------------|---------------|---------------|---------------|---------------|---------------|
|               | <i>CmFT1</i>                            | <i>CmFT2</i> | <i>CmFT3</i> | <i>CmTFL1</i> | <i>CmTFL2</i> | <i>CmTFL3</i> | <i>CmTFL4</i> | <i>CmMFT1</i> | <i>CmMFT2</i> |
| <i>CmFT1</i>  | 100.0                                   | 90.8         | 91.4         | 56.3          | 50.6          | 56.4          | 58.7          | 19.5          | 36.9          |
| <i>CmFT2</i>  | 92.2                                    | 100.0        | 93.7         | 54.5          | 49.4          | 55.8          | 57.6          | 18.2          | 38.7          |
| <i>CmFT3</i>  | 92.6                                    | 96.4         | 100.0        | 55.1          | 49.4          | 55.2          | 56.4          | 18.2          | 36.9          |
| <i>CmTFL1</i> | 56.0                                    | 54.4         | 55.4         | 100.0         | 91.0          | 65.5          | 76.8          | 19.0          | 38.2          |
| <i>CmTFL2</i> | 56.5                                    | 54.9         | 55.9         | 99.0          | 100.0         | 61.7          | 71.9          | 17.8          | 36.0          |
| <i>CmTFL3</i> | 54.6                                    | 53.9         | 53.7         | 66.4          | 66.9          | 100.0         | 65.3          | 19.5          | 37.1          |
| <i>CmTFL4</i> | 57.2                                    | 55.7         | 56.6         | 79.0          | 79.7          | 64.1          | 100.0         | 17.1          | 38.7          |
| <i>CmMFT1</i> | 35.7                                    | 35.5         | 34.7         | 38.0          | 37.8          | 38.6          | 37.0          | 100.0         | 19.6          |
| <i>CmMFT2</i> | 47.2                                    | 47.6         | 47.6         | 48.9          | 49.2          | 47.2          | 47.7          | 39.1          | 100.0         |

The identity of ORF sequences (%)

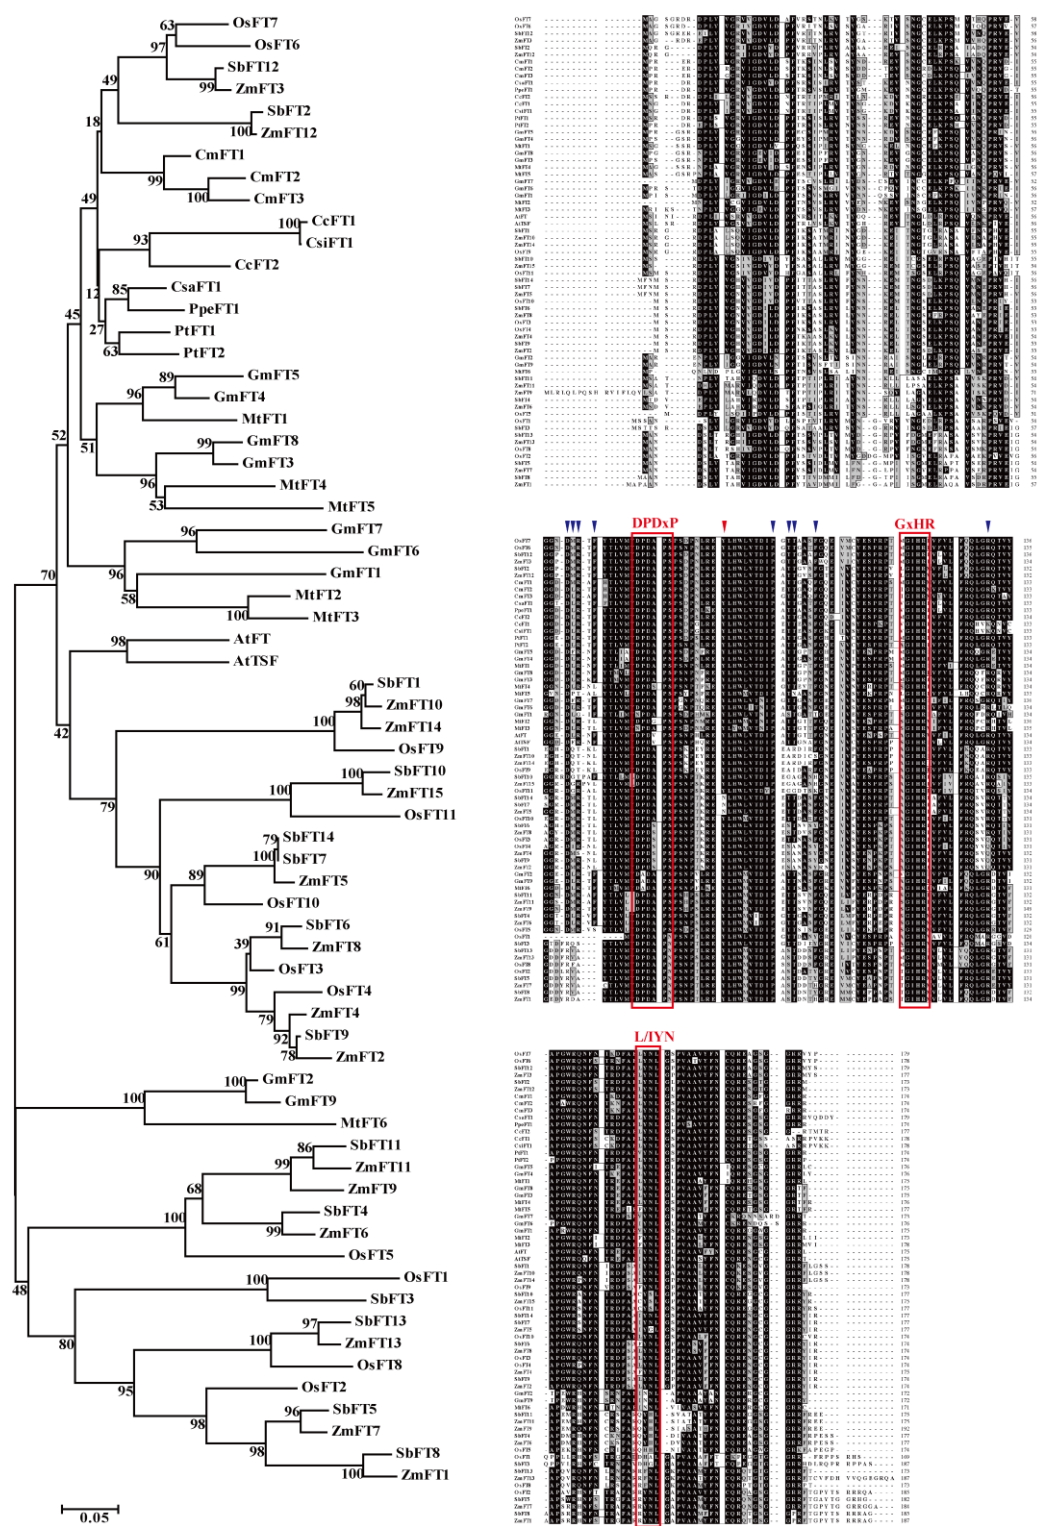

Figure S1. Predicted amino acid sequence alignment and phylogenetic tree of the *CmFTs* with the FT-like genes of other plant species.

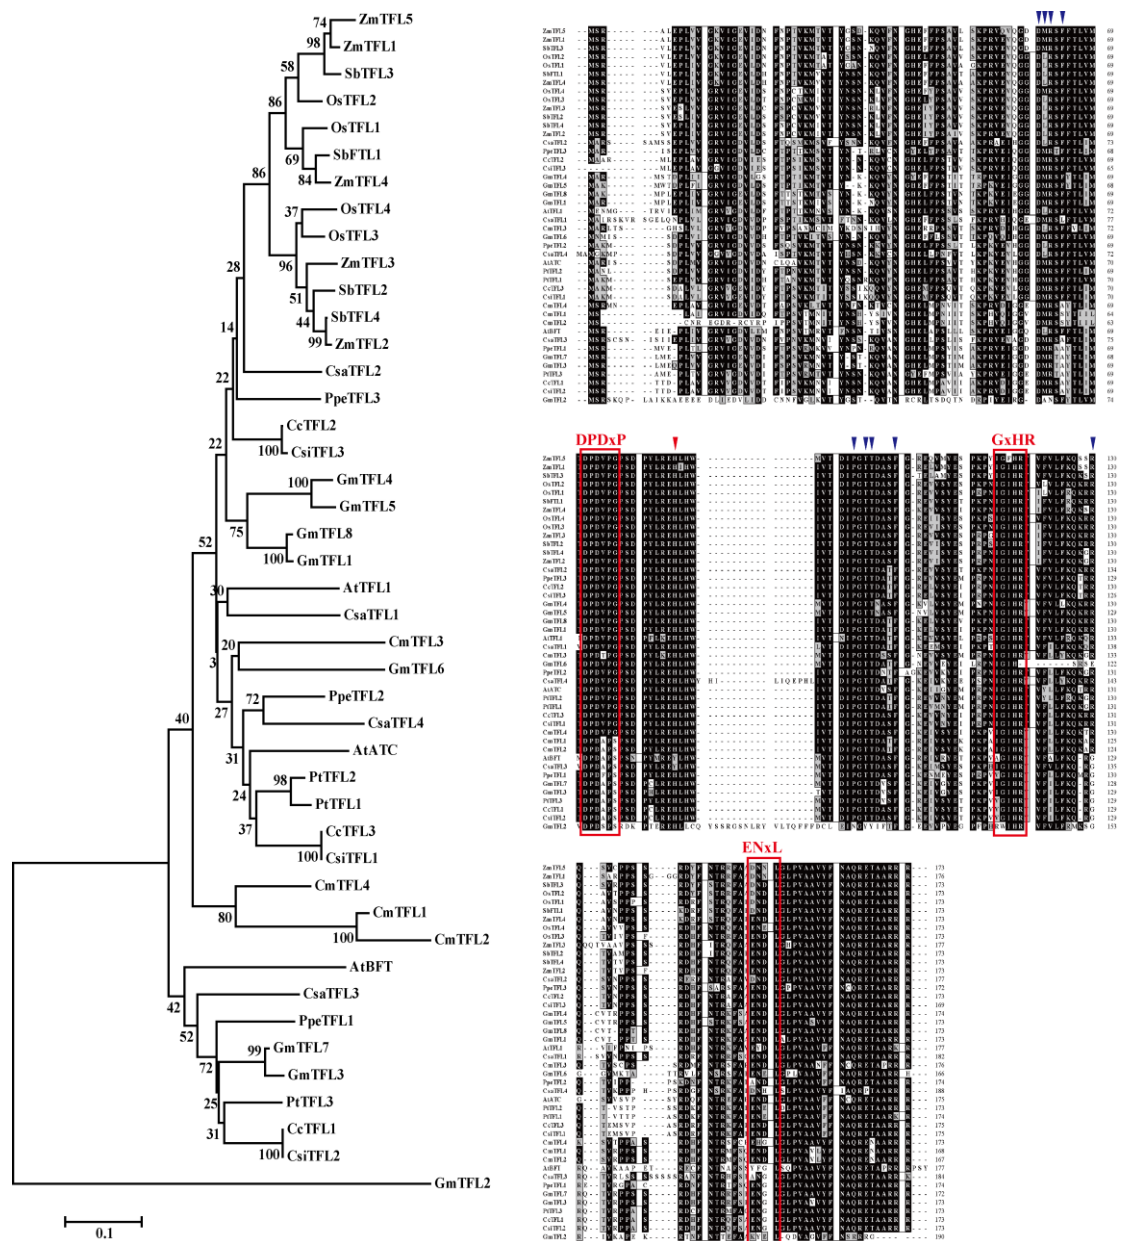

Figure S2. Predicted amino acid sequence alignment and phylogenetic tree of the *CmTFLs* with the TFL-like genes of other plant species.

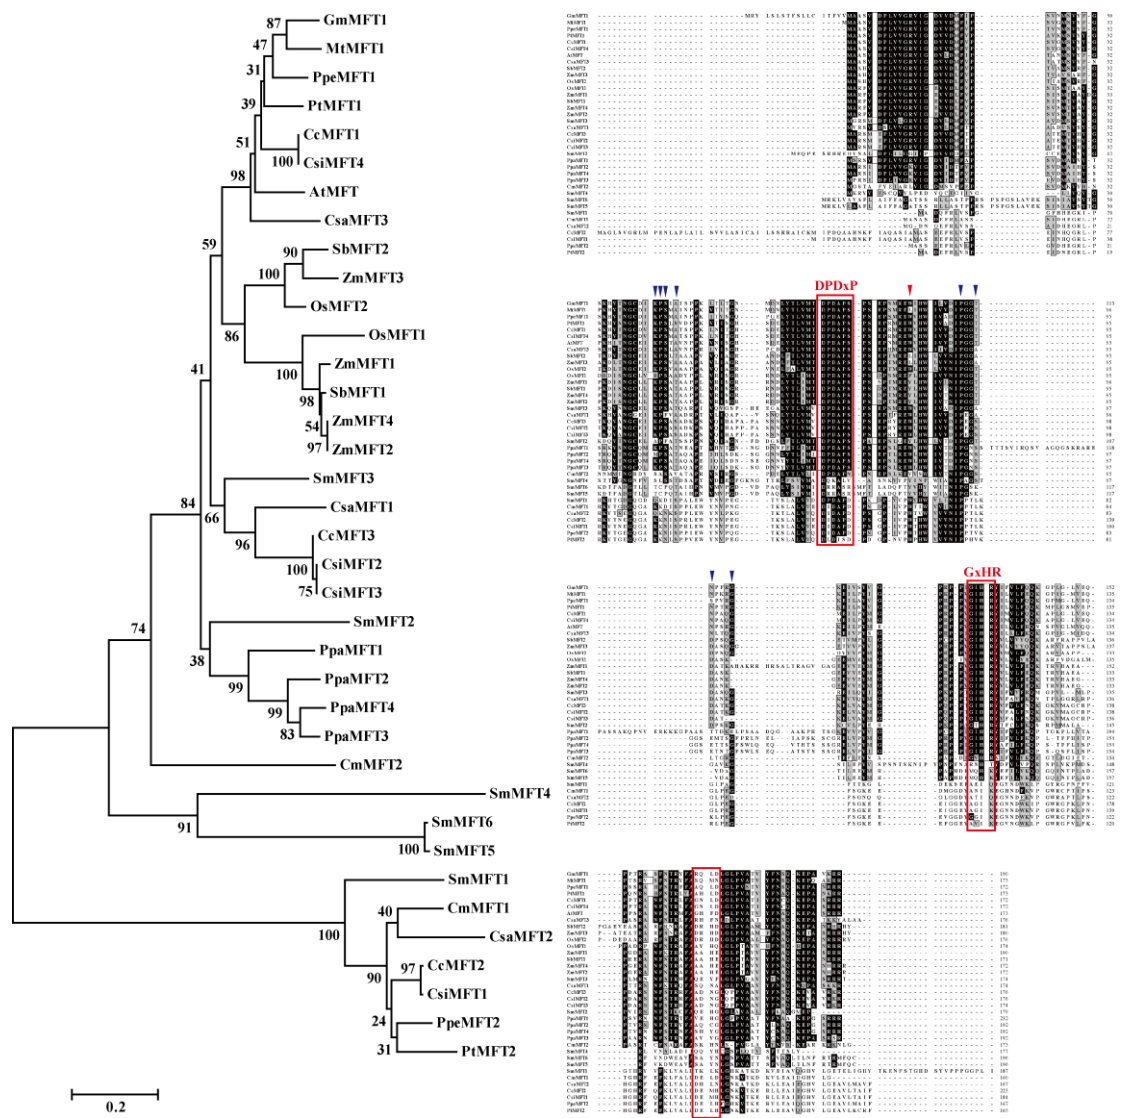

Figure S3. Predicted amino acid sequence alignment and phylogenetic tree of the *CmMFTs* with the MFT-like genes of other plant species.

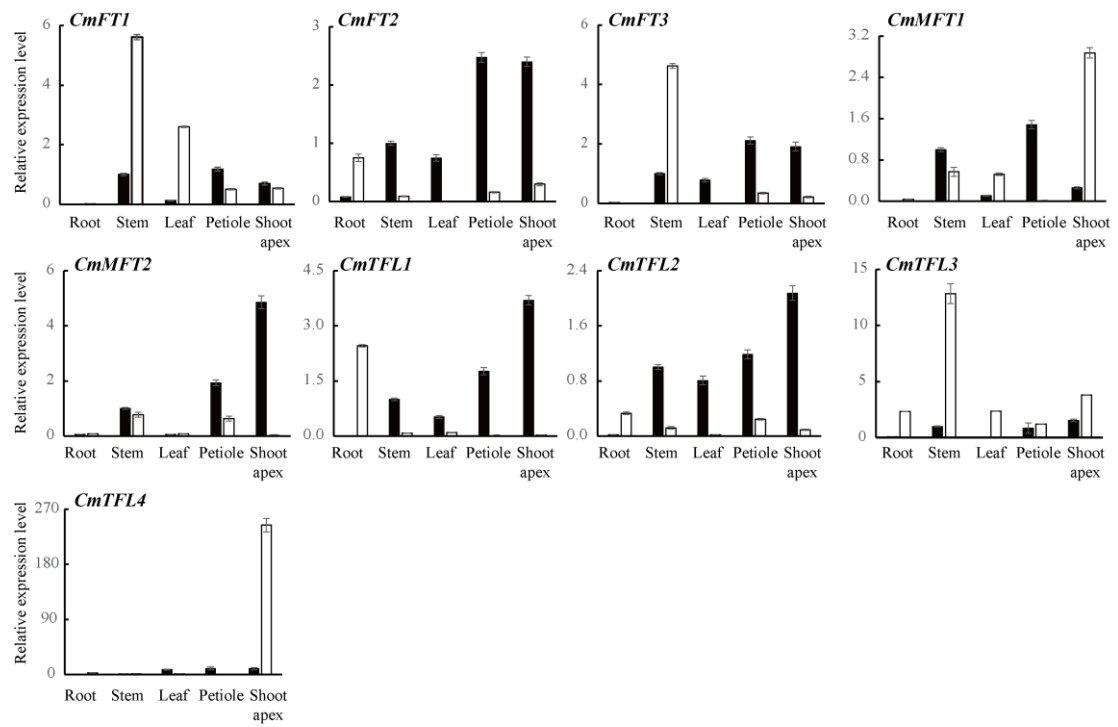

Figure S4. Tissue-specific expression profiles of *CmPEBPs*.

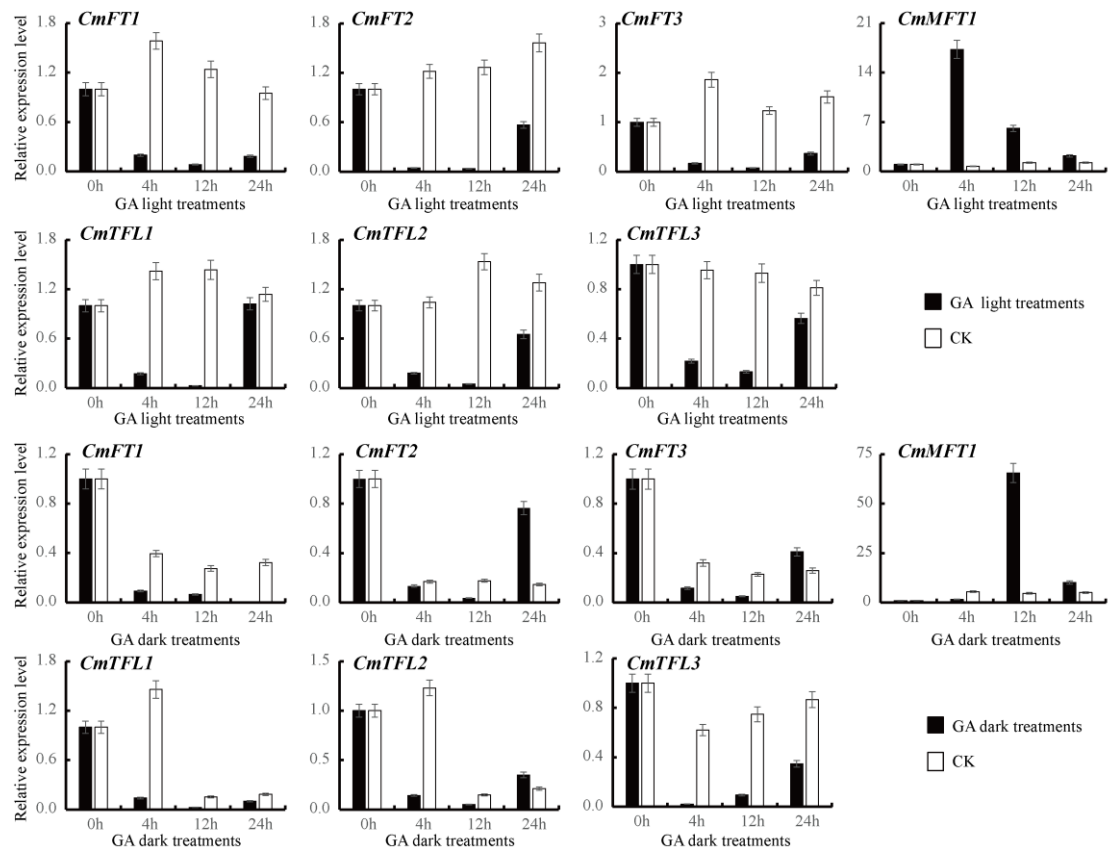

Figure S5. Expression profiles of *CmPEBP* genes in Chrysanthemum leaves under GA stresses.

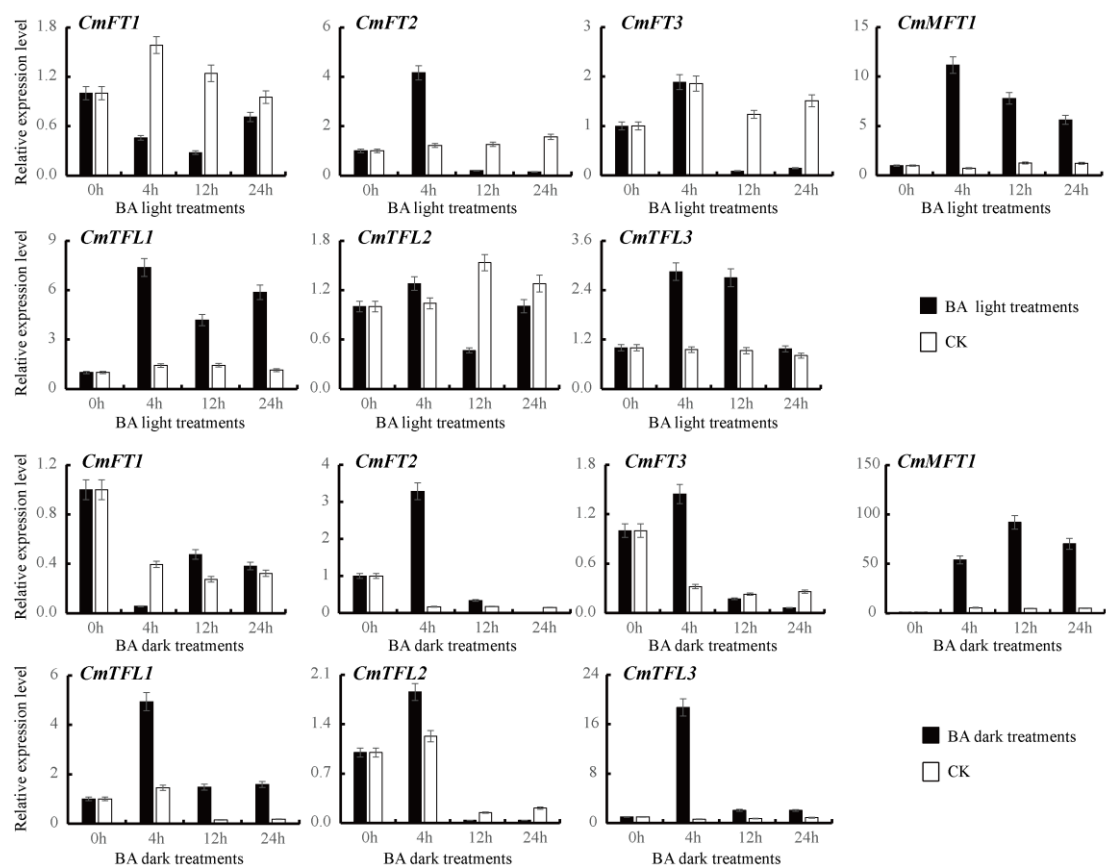

Figure S6. Expression profiles of *CmPEBP* genes in Chrysanthemum leaves under BA stresses.

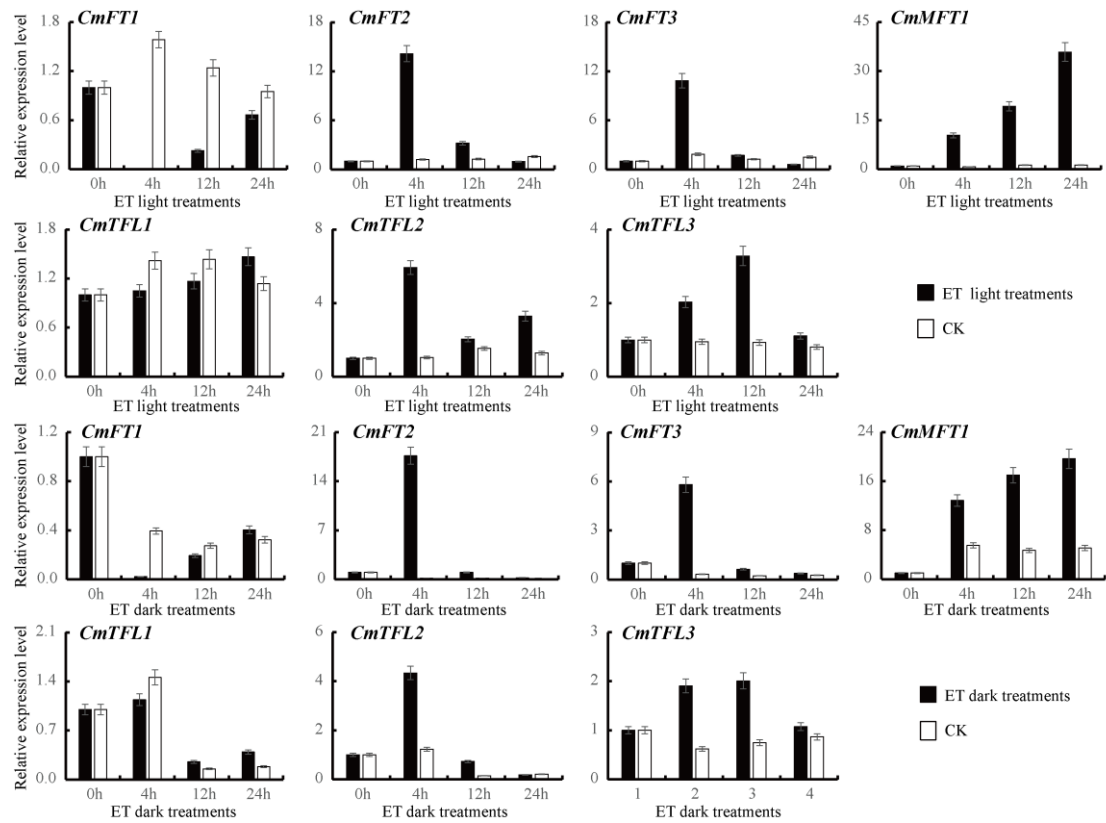

Figure S7. Expression profiles of *CmPEBP* genes in Chrysanthemum leaves under ET stresses.

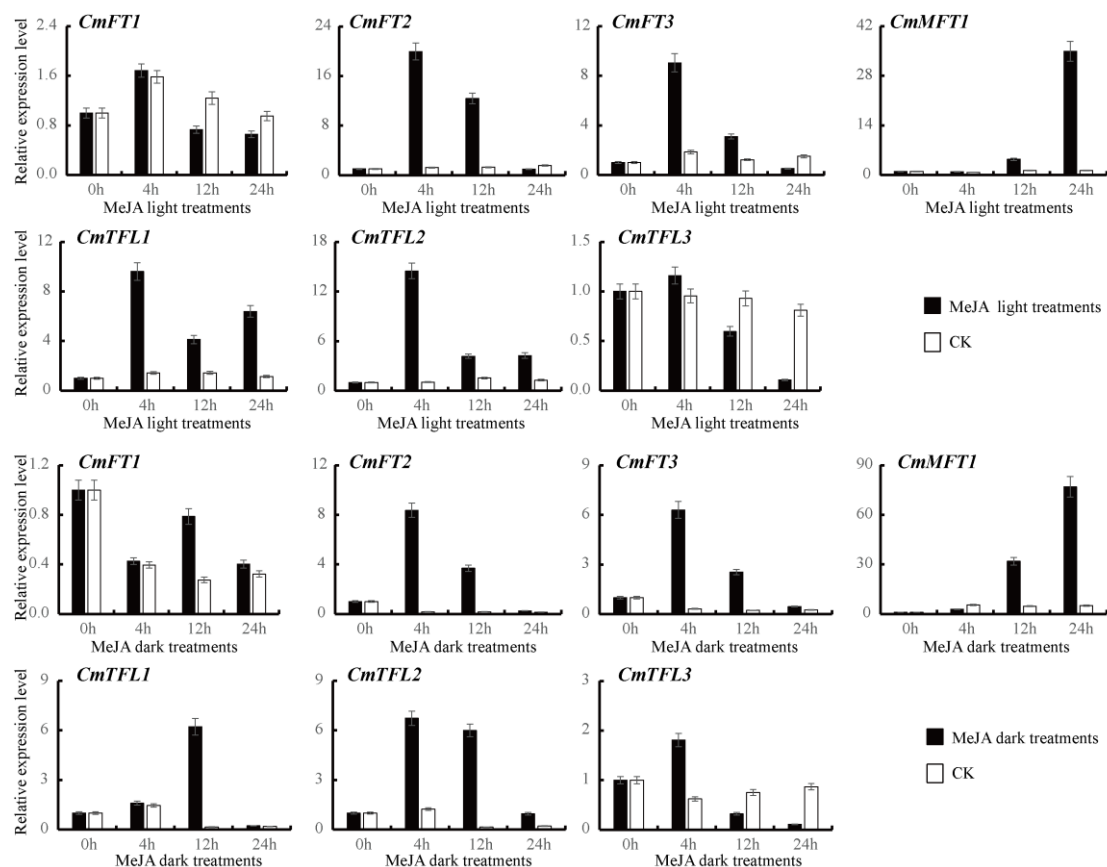

Figure S8. Expression profiles of *CmPEBP* genes in Chrysanthemum leaves under MeJA stresses .

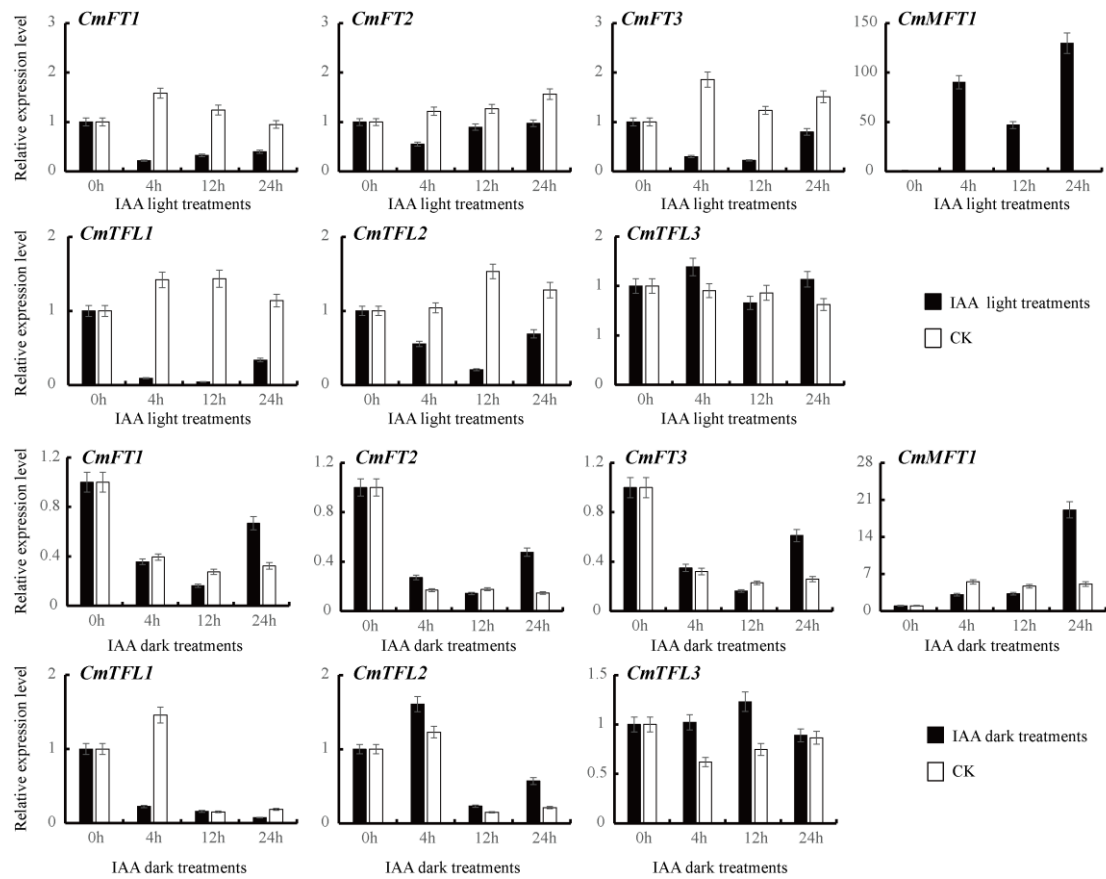

Figure S9. Expression profiles of *CmPEBP* genes in Chrysanthemum leaves under IAA stresses.

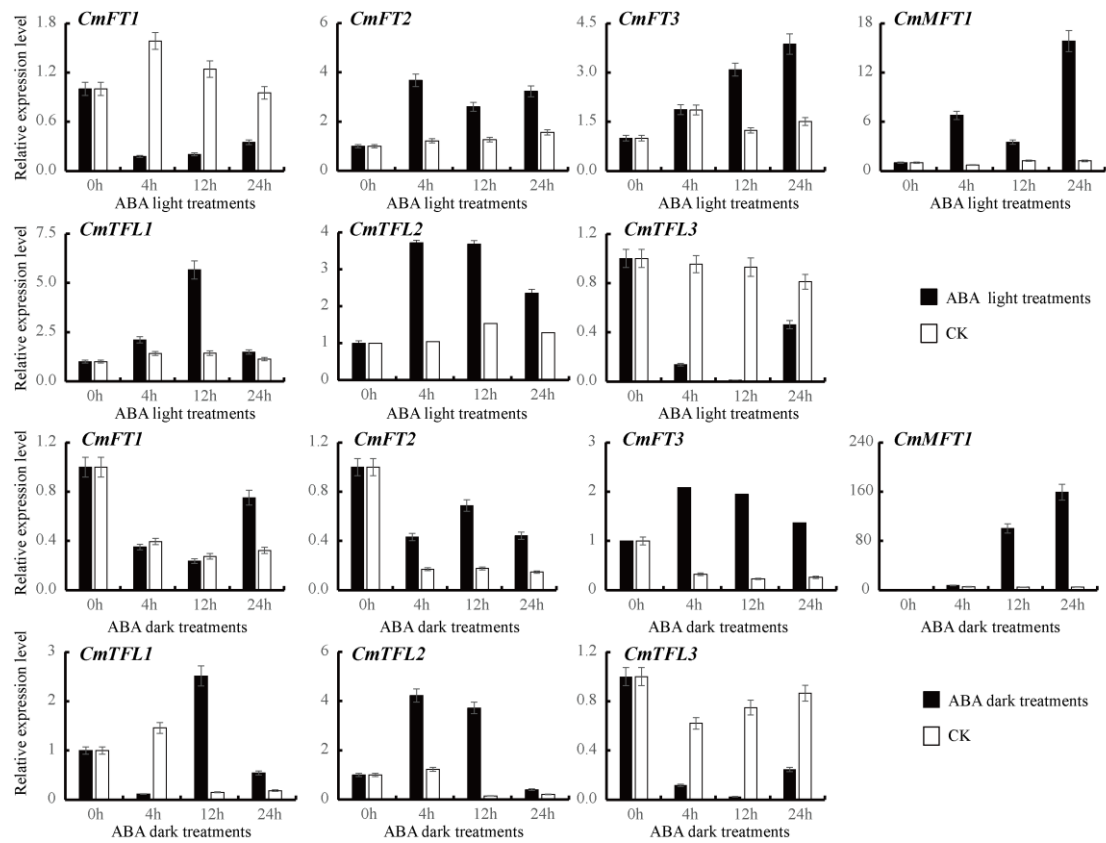

Figure S10. Expression profiles of *CmPEBP* genes in Chrysanthemum leaves under ABA stresses .

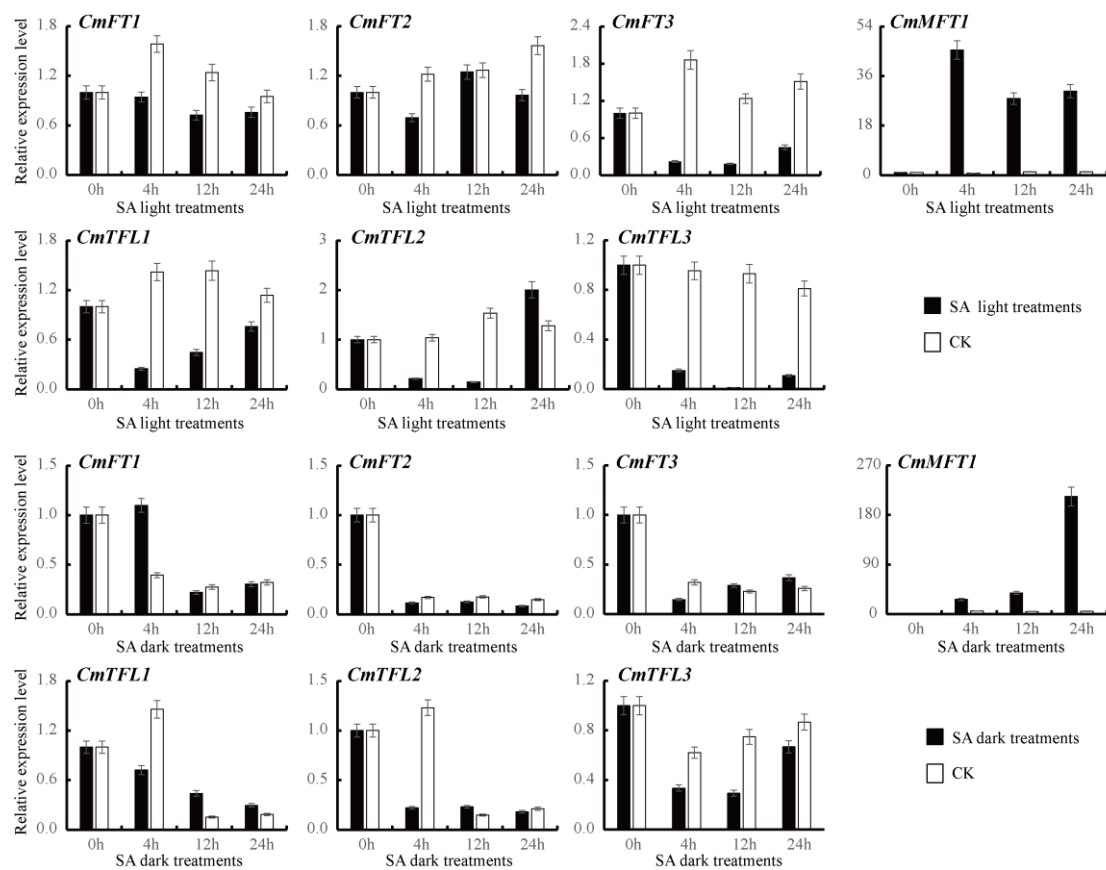

Figure S11. Expression profiles of *CmPEBP* genes in Chrysanthemum leaves under SA stresses.

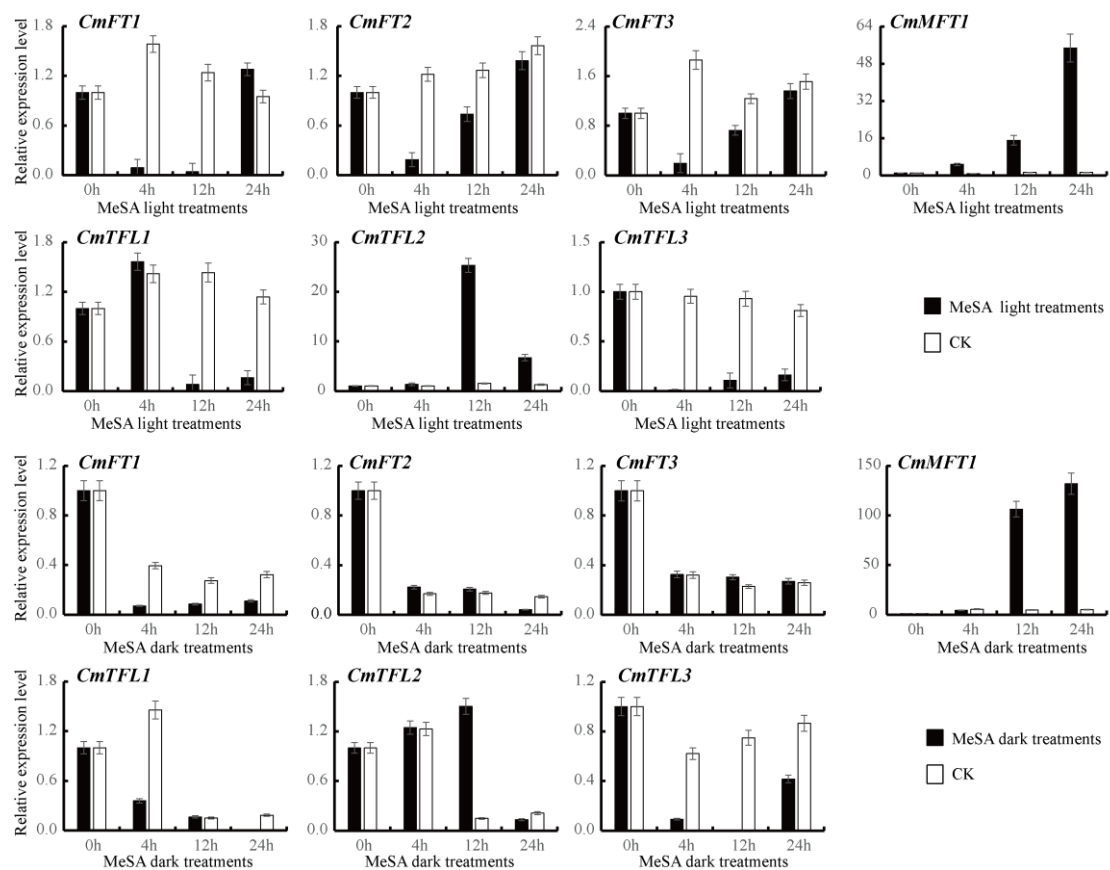

Figure S12. Expression profiles of *CmPEBP* genes in Chrysanthemum leaves under MeSA stresses .
